# Supplementary material for: Mineralogical response of the Mediterranean crustose coralline alga Lithophyllum cabiochae to near-future ocean acidification and warming
Source: Copernicus journal article supplement (doi:10.5194/bg-2016-160), 2016-05-02
Supplement: Supplementary file 1 [file bg-2016-160-supplement.pdf]

**Mineralogical response of Mediterranean crustose coralline algae *Lithophyllum cabiochae* to near-future ocean acidification and warming**

Supplementary data, Nash et al.

| <b>Treatment</b> | <b>400</b>                   | <b>400T+3</b> | <b>700</b>   | <b>700T+3</b> |
|------------------|------------------------------|---------------|--------------|---------------|
| <b>New crust</b> | <b>Mol% MgCO<sub>3</sub></b> |               |              |               |
| sample 1         | 14.7%                        | 15.6%         | 14.9%        | 16.4%         |
| sample 2         | 14.0%                        | 16.4%         | 15.2%        | 16.3%         |
| sample 3         | 15.1%                        | 15.9%         | 15.1%        | 16.0%         |
| sample 4         | 16.0%                        | 15.3%         | 15.1%        | 16.4%         |
| sample 5         | 14.8%                        | 16.2%         | 15.6%        | 15.9%         |
| sample 6         | 15.8%                        | 16.0%         | 15.4%        | 15.8%         |
| sample 7         | 15.6%                        | 16.9%         | 14.7%        | 15.8%         |
| sample 8         | 15.6%                        | 15.8%         | 14.1%        | 15.7%         |
| <b>average</b>   | <b>15.2%</b>                 | <b>16.0%</b>  | <b>15.0%</b> | <b>16.1%</b>  |
| <b>St. Dev</b>   | <b>0.7%</b>                  | <b>0.5%</b>   | <b>0.5%</b>  | <b>0.3%</b>   |

**Table 1:** XRD Mol% MgCO<sub>3</sub> for new crust.

| <b>Main thalli</b> |                |                              |                    |                     |
|--------------------|----------------|------------------------------|--------------------|---------------------|
| <b>Treatment</b>   |                | <b>Mol% MgCO<sub>3</sub></b> | <b>Asymm. mol%</b> | <b>Asymm. Diff.</b> |
| 400                | sample 1       | 15.36%                       | 15.74%             | 0.39%               |
| 400                | sample 2       | 15.45%                       | 16.16%             | 0.71%               |
| 400                | sample 3       | 15.49%                       | 16.11%             | 0.62%               |
| 400                | sample 4       | 16.72%                       | 17.68%             | 0.95%               |
| 400                | sample 5       | 15.99%                       | 16.67%             | 0.68%               |
| 400                | sample 6       | 16.53%                       | 18.15%             | 1.62%               |
| 400                | sample 7       | 16.25%                       | 17.08%             | 0.83%               |
| 400                | sample 8       | 16.45%                       | 18.09%             | 1.64%               |
|                    | <b>average</b> | <b>16.0%</b>                 | <b>17.0%</b>       | <b>0.9%</b>         |
|                    | <b>St. Dev</b> | <b>0.5%</b>                  | <b>0.9%</b>        | <b>0.5%</b>         |
|                    |                |                              |                    |                     |
| 400T+3             | sample 1       | 16.35%                       | 17.34%             | 0.99%               |
| 400T+3             | sample 2       | 15.57%                       | 16.20%             | 0.63%               |
| 400T+3             | sample 3       | 15.69%                       | 16.72%             | 1.03%               |
| 400T+3             | sample 4       | 16.14%                       | 17.42%             | 1.28%               |
| 400T+3             | sample 5       | 15.95%                       | 16.72%             | 0.77%               |
| 400T+3             | sample 6       | 16.63%                       | 17.58%             | 0.96%               |
| 400T+3             | sample 7       | 15.89%                       | 16.86%             | 0.97%               |
| 400T+3             | sample 8       | 16.16%                       | 16.93%             | 0.77%               |
|                    | <b>average</b> | <b>16.0%</b>                 | <b>17.0%</b>       | <b>0.9%</b>         |
|                    | <b>St. Dev</b> | <b>0.3%</b>                  | <b>0.5%</b>        | <b>0.2%</b>         |
|                    |                |                              |                    |                     |
| 700                | sample 1       | 15.57%                       | 16.57%             | 1.00%               |
| 700                | sample 2       | 16.25%                       | 18.08%             | 1.83%               |
| 700                | sample 3       | 15.75%                       | 16.62%             | 0.87%               |
| 700                | sample 4       | 15.87%                       | 16.32%             | 0.45%               |
| 700                | sample 5       | 15.75%                       | 16.99%             | 1.25%               |
| 700                | sample 6       | 16.00%                       | 16.95%             | 0.95%               |
| 700                | sample 7       | 15.24%                       | 16.04%             | 0.80%               |
| 700                | sample 8       | 14.95%                       | 15.29%             | 0.34%               |
|                    | <b>average</b> | <b>15.7%</b>                 | <b>16.6%</b>       | <b>0.9%</b>         |
|                    | <b>St. Dev</b> | <b>0.4%</b>                  | <b>0.8%</b>        | <b>0.5%</b>         |
|                    |                |                              |                    |                     |
| 700T+3             | sample 1       | 16.87%                       | 17.58%             | 0.71%               |
| 700T+3             | sample 2       | 16.66%                       | 17.83%             | 1.17%               |
| 700T+3             | sample 3       | 15.87%                       | 16.75%             | 0.88%               |
| 700T+3             | sample 4       | 16.53%                       | 17.73%             | 1.21%               |
| 700T+3             | sample 5       | 15.51%                       | 16.47%             | 0.96%               |

|        |                |              |              |             |
|--------|----------------|--------------|--------------|-------------|
| 700T+3 | sample 6       | 15.30%       | 16.49%       | 1.19%       |
| 700T+3 | sample 7       | 15.92%       | 17.16%       | 1.25%       |
| 700T+3 | sample 8       | 16.51%       | 18.04%       | 1.54%       |
|        | <b>average</b> | <b>16.1%</b> | <b>17.3%</b> | <b>1.1%</b> |
|        | <b>St. Dev</b> | <b>0.6%</b>  | <b>0.6%</b>  | <b>0.3%</b> |

**Table 2:** XRD Mol% MgCO<sub>3</sub> for main thalli.

| <b>Dissolution chips</b> |                |                              |                    |                    |
|--------------------------|----------------|------------------------------|--------------------|--------------------|
| <b>Treatment</b>         |                | <b>mol% MgCO<sub>3</sub></b> | <b>Asymm. mol%</b> | <b>Asymm. Diff</b> |
| 400T                     | sample 1       | 15.11%                       | 15.60%             | 0.49%              |
| 400T                     | sample 2       | 15.76%                       | 16.49%             | 0.74%              |
| 400T                     | sample 3       | 15.56%                       | 16.42%             | 0.85%              |
| 400T                     | sample 4       | 14.66%                       | 15.67%             | 1.00%              |
| 400T                     | sample 5       | 14.95%                       | 16.21%             | 1.26%              |
| 400T                     | sample 6       | 16.35%                       | 17.38%             | 1.03%              |
| 400T                     | sample 7       | 15.35%                       | 16.43%             | 1.07%              |
| 400T                     | sample 8       | 15.44%                       | 16.26%             | 0.81%              |
|                          | <b>average</b> | <b>15.4%</b>                 | <b>16.3%</b>       | <b>0.9%</b>        |
|                          | <b>St. Dev</b> | <b>0.5%</b>                  | <b>0.6%</b>        | <b>0.2%</b>        |
|                          |                |                              |                    |                    |
| 400T+3                   | sample 1       | 15.72%                       | 16.51%             | 0.79%              |
| 400T+3                   | sample 2       | 15.80%                       | 16.58%             | 0.79%              |
| 400T+3                   | sample 3       | 15.79%                       | 16.63%             | 0.84%              |
| 400T+3                   | sample 4       | 15.71%                       | 16.80%             | 1.09%              |
| 400T+3                   | sample 5       | 16.40%                       | 17.48%             | 1.08%              |
| 400T+3                   | sample 6       | 14.95%                       | 15.40%             | 0.45%              |
| 400T+3                   | sample 7       | 15.36%                       | 16.04%             | 0.68%              |
| 400T+3                   | sample 8       | 15.12%                       | 15.69%             | 0.58%              |
|                          | <b>average</b> | <b>15.6%</b>                 | <b>16.4%</b>       | <b>0.8%</b>        |
|                          | <b>St. Dev</b> | <b>0.5%</b>                  | <b>0.7%</b>        | <b>0.2%</b>        |
|                          |                |                              |                    |                    |
| 700T                     | sample 1       | 15.43%                       | 15.95%             | 0.52%              |
| 700T                     | sample 2       | 15.53%                       | 16.28%             | 0.75%              |
| 700T                     | sample 3       | 15.12%                       | 15.68%             | 0.56%              |
| 700T                     | sample 4       | 16.59%                       | 17.53%             | 0.94%              |
| 700T                     | sample 5       | 15.14%                       | 15.88%             | 0.73%              |
| 700T                     | sample 6       | 15.85%                       | 16.38%             | 0.52%              |
| 700T                     | sample 7       | 15.32%                       | 15.67%             | 0.34%              |
| 700T                     | sample 8       | 15.73%                       | 16.64%             | 0.91%              |
|                          | <b>average</b> | <b>15.6%</b>                 | <b>16.2%</b>       | <b>0.7%</b>        |
|                          | <b>St. Dev</b> | <b>0.5%</b>                  | <b>0.6%</b>        | <b>0.2%</b>        |
|                          |                |                              |                    |                    |
| 700T+3                   | sample 1       | 15.54%                       | 15.90%             | 0.36%              |
| 700T+3                   | sample 2       | 15.68%                       | 16.27%             | 0.60%              |

|        |                |              |              |             |
|--------|----------------|--------------|--------------|-------------|
| 700T+3 | sample 3       | 15.79%       | 16.71%       | 0.92%       |
| 700T+3 | sample 4       | 15.12%       | 15.64%       | 0.52%       |
| 700T+3 | sample 5       | 15.62%       | 16.15%       | 0.53%       |
| 700T+3 | sample 6       | 15.35%       | 16.23%       | 0.88%       |
| 700T+3 | sample 7       | 16.11%       | 17.33%       | 1.22%       |
| 700T+3 | sample 8       | 15.07%       | 15.68%       | 0.62%       |
|        | <b>average</b> | <b>15.5%</b> | <b>16.2%</b> | <b>0.7%</b> |
|        | <b>St. Dev</b> | <b>0.3%</b>  | <b>0.6%</b>  | <b>0.3%</b> |

**Table 3:** XRD Mol% MgCO<sub>3</sub> for dissolution chips.
